# Supplementary material for: Reduction of pro-inflammatory effector functions through remodeling of fatty acid metabolism in CD8+ T-cells from Rheumatoid Arthritis patients
Source: bioRxiv or medRxiv preprint supplement (doi:10.1101/2022.09.22.22280236), 2022-09-23

**A**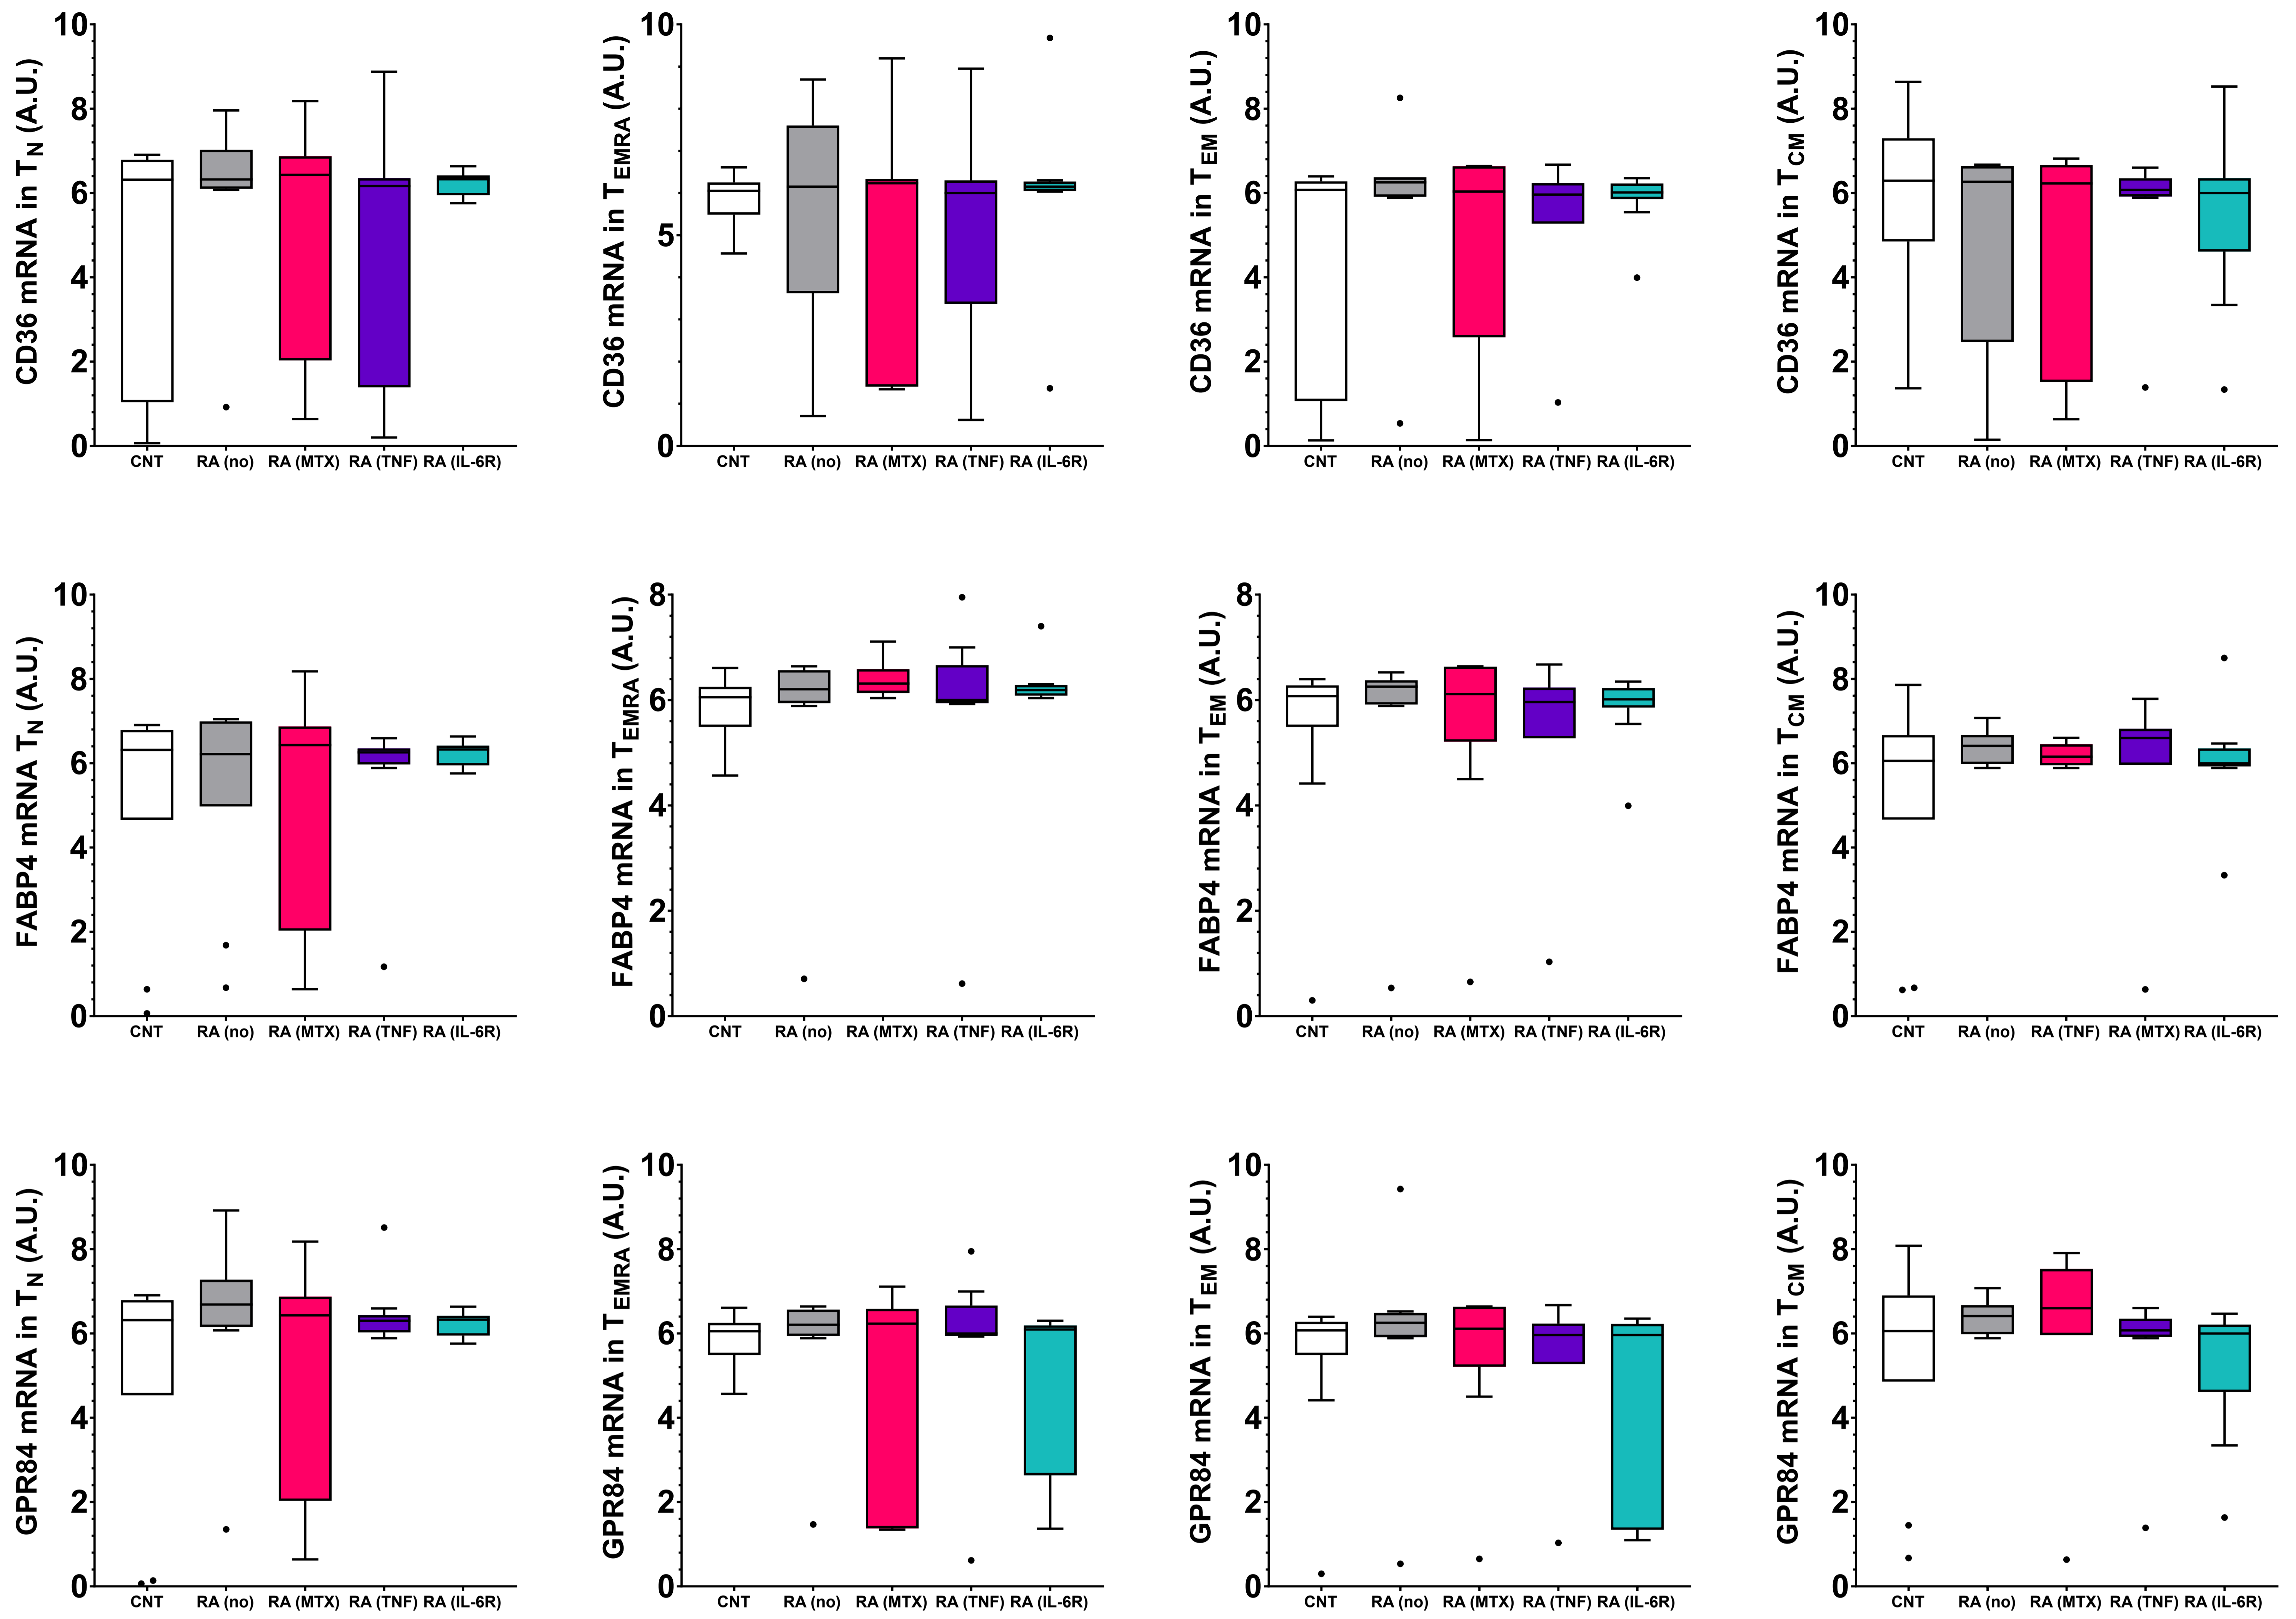**B**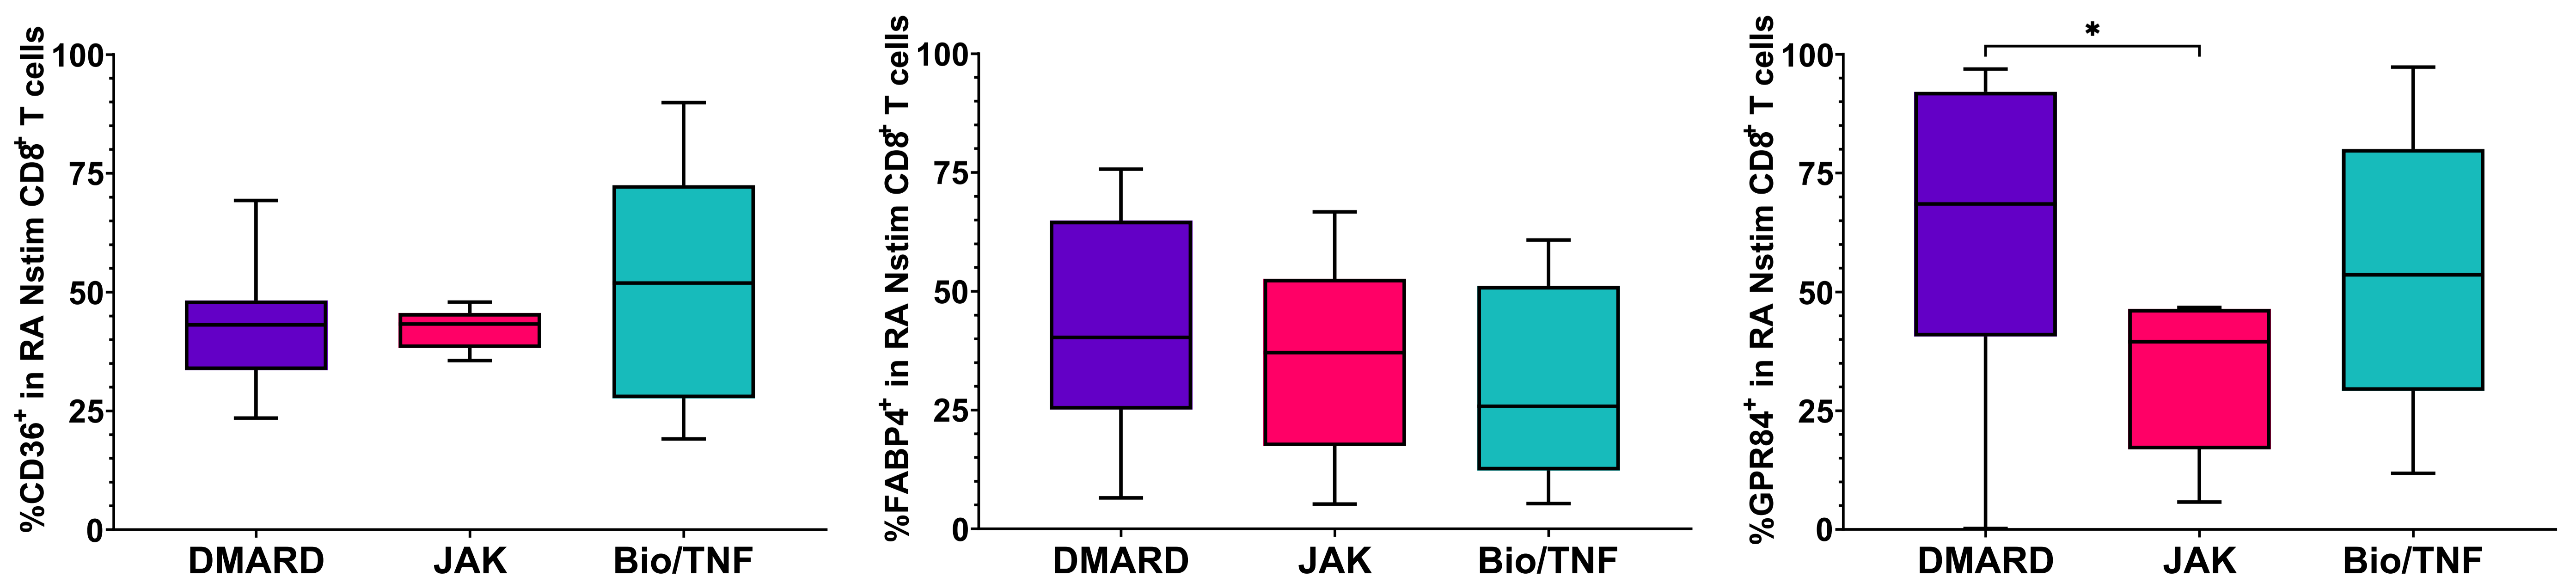

Supplement: Supplementary file [file media-3.pdf]
